# Supplementary material for: Welfare-improving enrichments greatly reduce hens’ startle responses, despite little change in judgment bias
Source: PubMed Central journal article supplement (PMC6695442; doi:10.1038/s41598-019-48351-6), 2019-08-15
Supplement: 41598_2019_48351_MOESM1_ESM.pdf [file 41598_2019_48351_MOESM1_ESM.pdf]

Welfare-improving enrichments greatly reduce hens' startle responses, despite little change in judgment bias

Misha Ross, Anna Garland, Alexandra Harlander-Matauschek, Lindsey Kitchenham, and Georgia Mason

| <b>Day</b> | <b>Procedure</b>                       |
|------------|----------------------------------------|
| 0          | Move hens to experimental housing      |
| 0 - 33     | Judgment bias task training            |
| 35, 37     | Startle Reflex Test 1                  |
| 38 - 42    | Judgment Bias Test 1 (Sessions 1-5)    |
| 48         | Switch housing                         |
| 53 - 57    | Judgment Bias Test 2 (Sessions 6 – 10) |
| 58, 60     | Startle Reflex Test 2                  |

**Table S1.** Timeline showing the duration of housing treatments and order of testing.

| <b>All hens</b> |          | <b>Mean</b> | <b>Stdev</b> | <b>N</b> | <b>Mean difference</b> | <b>Pooled SD</b> | <b>Cohen's D</b> |
|-----------------|----------|-------------|--------------|----------|------------------------|------------------|------------------|
| <b>JB</b>       | Control  | 0.9354      | 0.2787       | 11       | 0.0745                 | 0.2419           | 0.3081           |
|                 | Enriched | 1.0099      | 0.2028       | 12       |                        |                  |                  |
| <b>Startle</b>  | Control  | 4.2120      | 0.5482       | 11       | -1.1214                | 0.4732           | -2.370           |
|                 | Enriched | 3.0906      | 0.3929       | 12       |                        |                  |                  |

| <b>Exploratory hens</b> |          | <b>Mean</b> | <b>Stdev</b> | <b>N</b> | <b>Mean difference</b> | <b>Pooled SD</b> | <b>Cohen's D</b> |
|-------------------------|----------|-------------|--------------|----------|------------------------|------------------|------------------|
| <b>JB</b>               | Control  | 0.9341      | 0.2785       | 5        | 0.1006                 | 0.2348           | 0.4286           |
|                         | Enriched | 1.0347      | 0.1927       | 6        |                        |                  |                  |
| <b>Startle</b>          | Control  | 4.6587      | 0.1794       | 5        | -1.4019                | 0.3827           | -3.6628          |
|                         | Enriched | 3.2568      | 0.4878       | 6        |                        |                  |                  |

| <b>Non-exploratory hens</b> |          | <b>Mean</b> | <b>Stdev</b> | <b>N</b> | <b>Mean difference</b> | <b>Pooled SD</b> | <b>Cohen's D</b> |
|-----------------------------|----------|-------------|--------------|----------|------------------------|------------------|------------------|
| <b>JB</b>                   | Control  | 0.9364      | 0.3054       | 6        | 0.04867                | 0.2694           | 0.1807           |
|                             | Enriched | 0.9851      | 0.2278       | 6        |                        |                  |                  |
| <b>Startle</b>              | Control  | 3.8397      | 0.4575       | 6        | -0.9155                | 0.3497           | -2.6182          |
|                             | Enriched | 2.9242      | 0.1877       | 6        |                        |                  |                  |

**Table S2.** Period 1 Effect size and pooled standard deviations for all hens, and for the two personality types
